# Supplementary material
Source: PubMed Central journal article supplement (PMC2921853)
Supplement: NIHMS68033-supplement-F2.pdf [file NIHMS68033-supplement-F2.pdf]

exon 9      G C C A T G T T T G C C A G C T A C G T C C C T G A A A T C A T A G A G T T A A T A G G A A A C  
 exon 9alt   • • A • • • • • • • • • • C • • • • • • • • • • G • • • C • • • • • • T G C T • C T C • T • • C C T G • G T

|           |   |   |   |   |   |   |   |   |   |   |   |   |   |   |   |   |
|-----------|---|---|---|---|---|---|---|---|---|---|---|---|---|---|---|---|
| exon 9    | A | M | F | A | S | Y | V | P | E | I | I | E | L | I | G | N |
| exon 9alt | • | • | • | • | R | • | • | • | • | • | A | A | • | • | L | S |

exon 9      C G C A A G A A A T A C G G G G G C T C C T A T A G T G C G G T T A G T G G A A G A A A  
 exon 9alt   • • G • • T • • • • • T • • • • C • • G A • T • T • • A C A C C A C • G • A • • C • • • • •

|           |   |   |   |   |   |   |   |   |   |   |   |   |   |   |   |
|-----------|---|---|---|---|---|---|---|---|---|---|---|---|---|---|---|
| exon 9    | R | K | K | Y | G | G | S | Y | S | A | V | S | G | R | K |
| exon 9alt | • | N | • | F | • | • | T | F | N | K | H | G | • | • | • |

Suppl. Fig. 2
