# Supplementary material
Source: PubMed Central journal article supplement (PMC2921853)

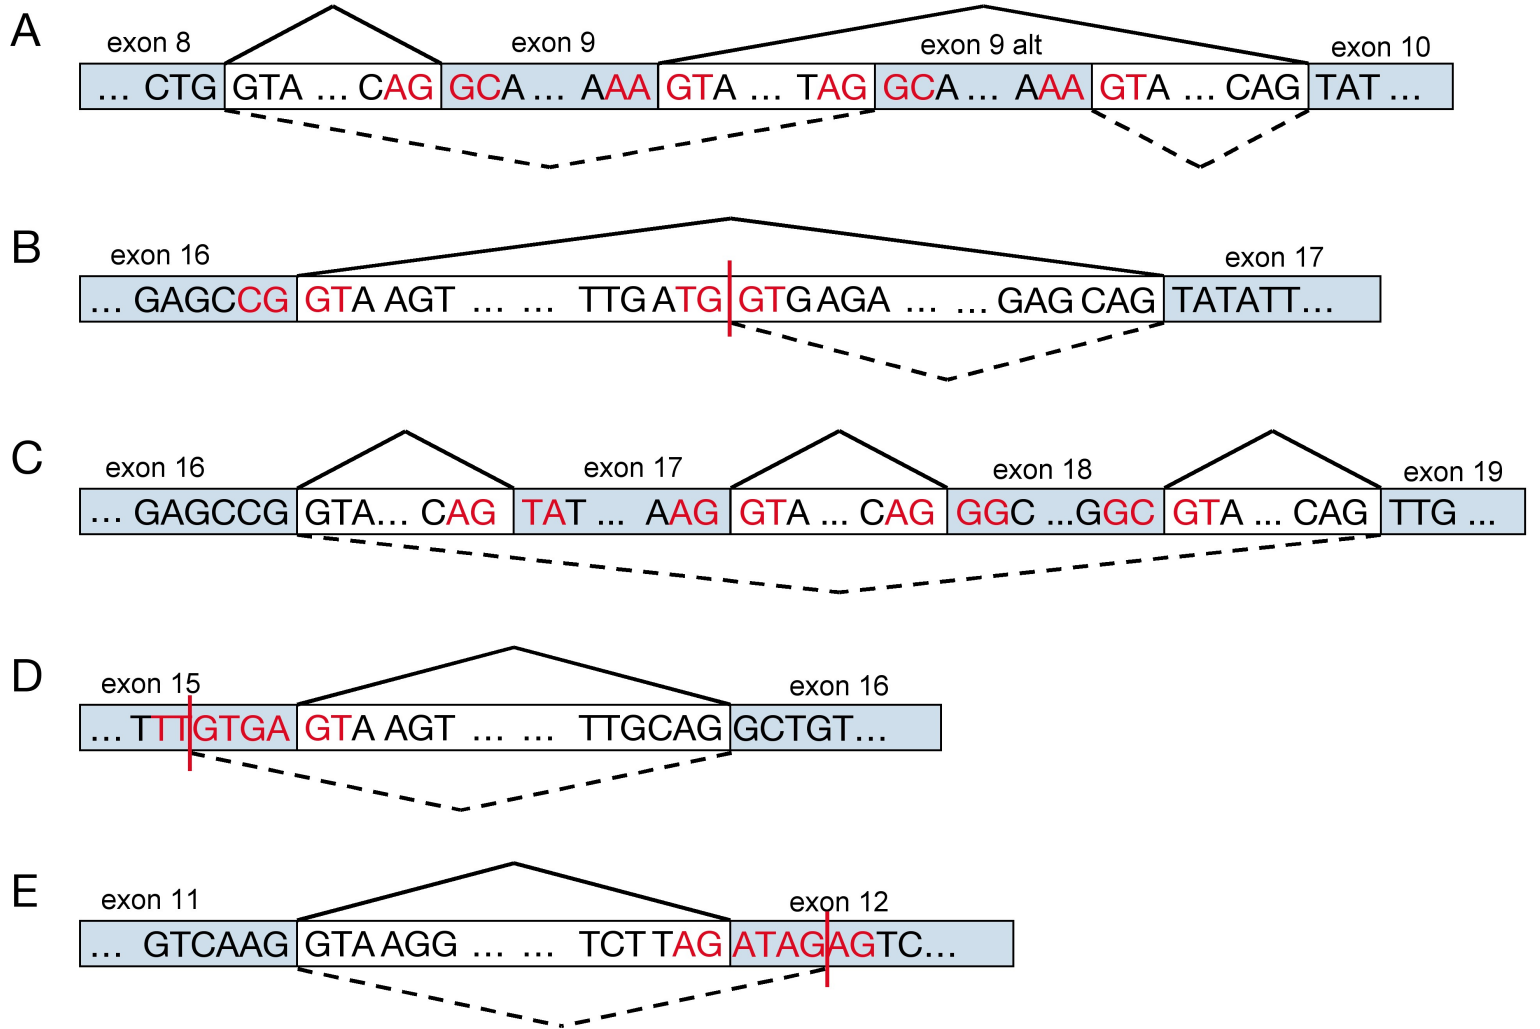

Suppl. Fig. 1

Supplement: NIHMS68033-supplement-F1.pdf [file NIHMS68033-supplement-F1.pdf]

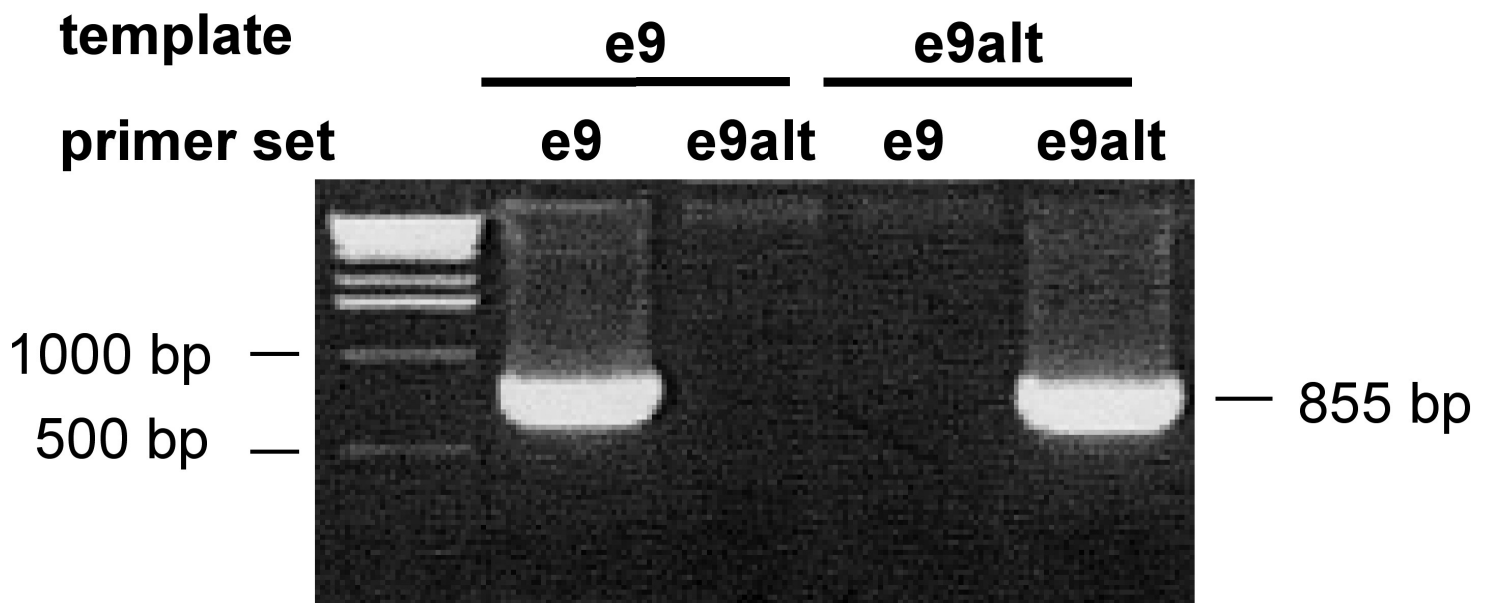

Suppl. Fig. 3

Supplement: NIHMS68033-supplement-F3.pdf [file NIHMS68033-supplement-F3.pdf]

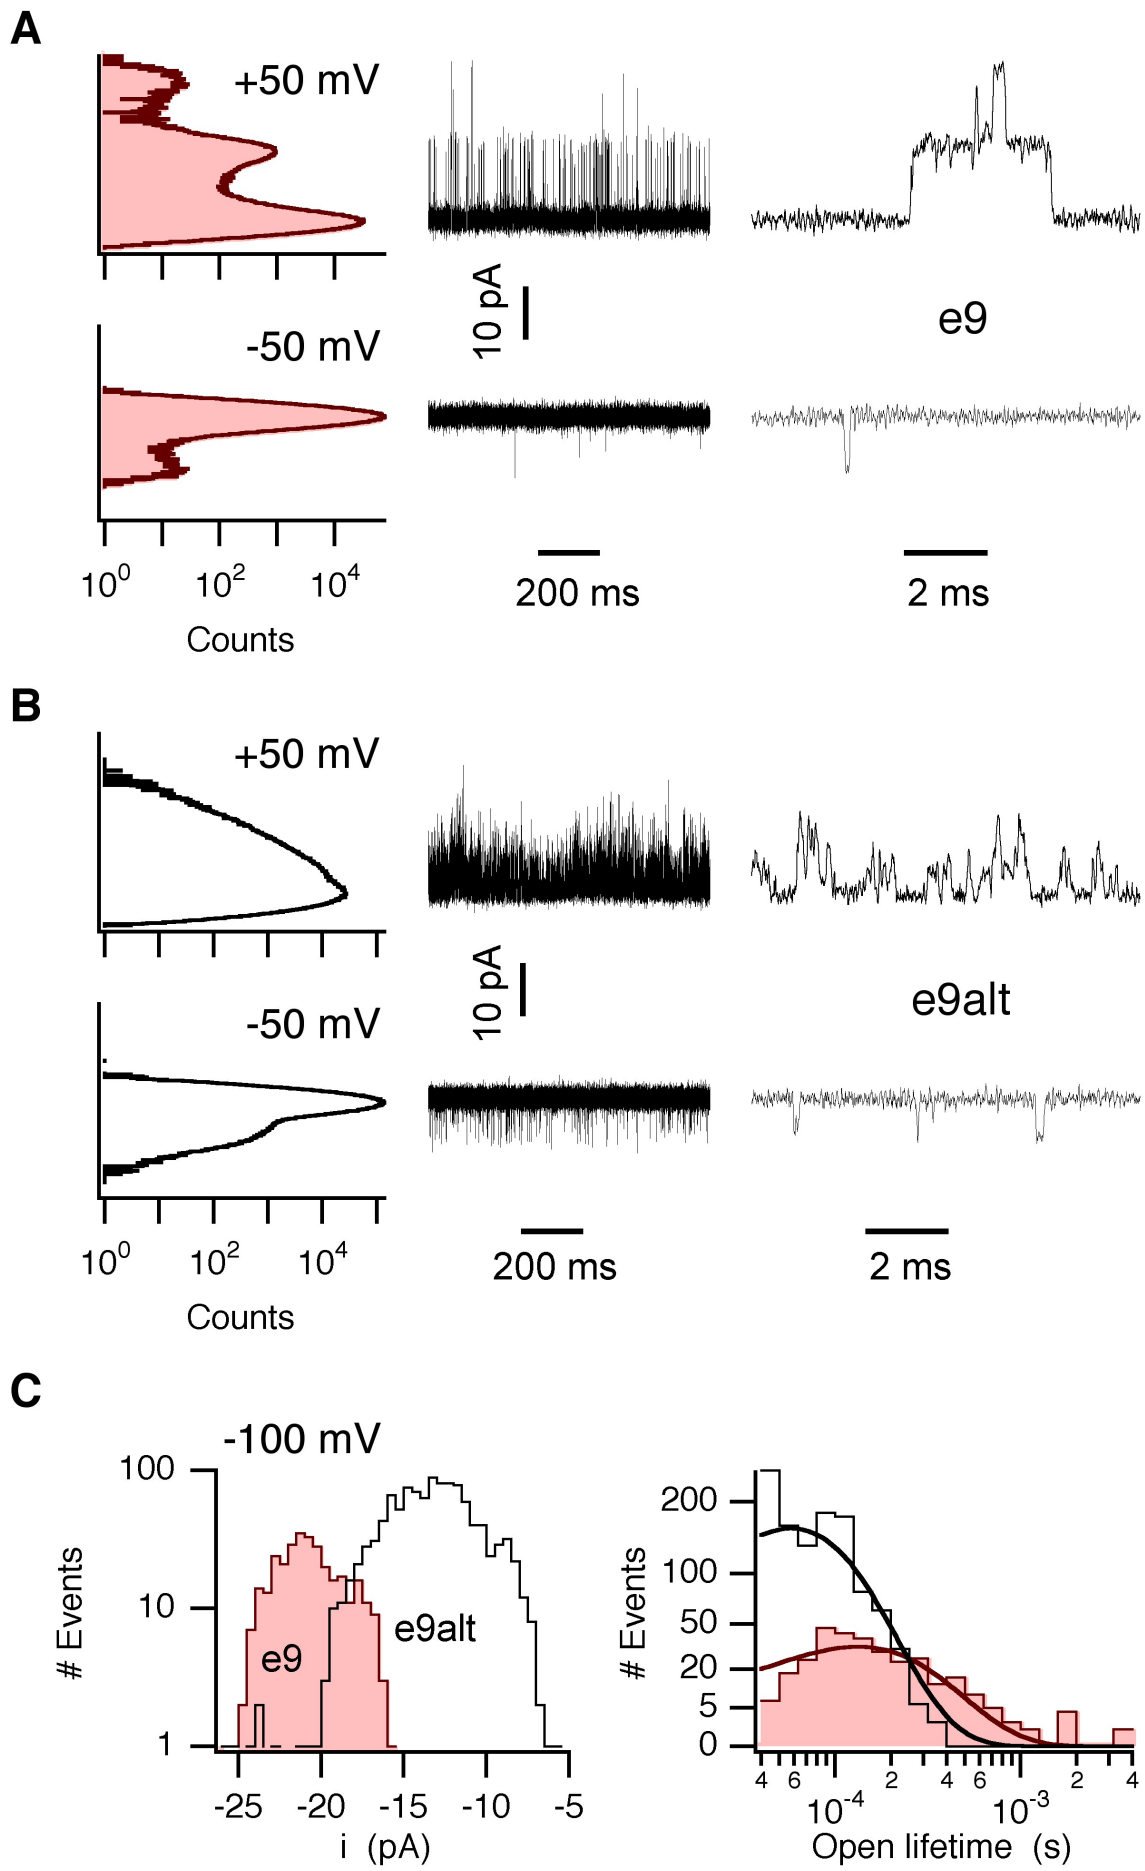

Fig. 4

Supplement: NIHMS68033-supplement-F4.pdf [file NIHMS68033-supplement-F4.pdf]
